# Supplementary material
Source: HighWire-hosted journal article supplement (https://bmjopen.bmj.com/content/14/8/e087319)
Supplement: inline-supplementary-material-1 [file inline-supplementary-material-1.pdf]

|   | PICO Question                                                                                                        |
|---|----------------------------------------------------------------------------------------------------------------------|
| 1 | Is there significant difference in SCP VD measured by OCTA between healthy pregnant women and non-pregnant controls? |
| 2 | Is there significant difference in DCP VD measured by OCTA between healthy pregnant women and non-pregnant controls? |
| 3 | Is there significant difference in FAZ measured by OCTA between healthy pregnant women and non-pregnant controls?    |
| 4 | Is there significant difference in CC VD measured by OCTA between healthy pregnant women and non-pregnant controls?  |

Table2 PICO Questions PICO, Population, Intervention, Comparator, Outcome; OCTA, optical coherence tomography angiography; SCP VD, superficial capillary plexus vascular density; DCP VD, deep capillary plexus vascular density; FAZ, the foveal avascular zone; CC VD, choriocapillaris vascular density.
